# Supplementary material for: Metabarcoding of ichthyoplankton communities associated with a highly dynamic shelf region of the southwest Indian Ocean
Source: PubMed Central journal article supplement (PMC10138858; doi:10.1371/journal.pone.0284961), 2023-04-27
Supplement: pone.0284961.s001.pdf [file pone.0284961.s001.pdf]

**S1 Table. Samples collected (n = 88) from the different transects (iSimangaliso, Richards Bay, Thukela, Durban (1 and 2), and Aliwal) at different depth soundings (20, 50, 100 m) using different net types (R = ring, M = manta, W= WP2). The number next to each net type indicates the number of replicates per net taken at each depth sounding. 20/30\* - 20 m was sampled at all the transects except at Richards Bay where only 30 m was sampled.**

| <b>Depth</b>  | <b>iSimangaliso</b> | <b>Richards Bay</b> | <b>Thukela</b> | <b>Durban 1</b> | <b>Durban 2</b> | <b>Aliwal</b> |
|---------------|---------------------|---------------------|----------------|-----------------|-----------------|---------------|
| <b>20/30*</b> | 1R, 1M, 1W          | 2R                  | 3R, 1M, 1W     | 3R, 1W          | 3R, 1M, 1W      | 3R, 1M, 1W    |
| <b>50</b>     | 1R, 1M, 1W          | -                   | 3R, 1M, 1W     | 2R, 1M, 1W      | 3R, 1M, 1W      | 3R, 1M, 1W    |
| <b>100</b>    | 1R, 1M, 1W          | -                   | 3R, 1M, 1W     | 3R, 1M, 1W      | 3R, 1M, 1W      | 3R, 1M, 1W    |
| <b>200</b>    | -                   | -                   | 3R, 1M, 1W     | 2R, 1M, 1W      | 3R, 1M, 1W      | 3R, 1M, 1W    |
