# Supplementary material for: Metabarcoding of ichthyoplankton communities associated with a highly dynamic shelf region of the southwest Indian Ocean
Source: PubMed Central journal article supplement (PMC10138858; doi:10.1371/journal.pone.0284961), 2023-04-27
Supplement: pone.0284961.s002.pdf [file pone.0284961.s002.pdf]

**S2 Table. High-throughput sequencing outputs for each of the depth soundings per transect.**

| <b>Library</b>                | <b>Depth</b> | <b>Read count</b> | <b>Merged reads</b> | <b>Total amplicon sequence variants</b> | <b>Total amplicon sequence variants of ichthyoplankton</b> | <b>Total merged amplicon sequence variants</b> | <b>Merged amplicon sequence variants assigned to species level</b> |
|-------------------------------|--------------|-------------------|---------------------|-----------------------------------------|------------------------------------------------------------|------------------------------------------------|--------------------------------------------------------------------|
| <b>iSimangaliso</b>           | 20           | 797208            | 19745               | 250                                     | 23                                                         | 16                                             | 13                                                                 |
|                               | 50           | 745330            | 25241               | 206                                     | 22                                                         | 13                                             | 11                                                                 |
|                               | 100          | 601588            | 16896               | 191                                     | 32                                                         | 15                                             | 11                                                                 |
| <b>Richards bay</b>           | 30           | 1391991           | 45588               | 149                                     | 7                                                          | 6                                              | 6                                                                  |
| <b>Thukela</b>                | 20           | 226444            | 17173               | 76                                      | 24                                                         | 7                                              | 7                                                                  |
|                               | 50           | 250990            | 9817                | 73                                      | 11                                                         | 3                                              | 3                                                                  |
|                               | 100          | 330306            | 22734               | 93                                      | 41                                                         | 10                                             | 6                                                                  |
|                               | 200          | 238170            | 12742               | 105                                     | 26                                                         | 11                                             | 10                                                                 |
| <b>Durban 2018</b>            | 20           | 658916            | 8539                | 88                                      | 14                                                         | 6                                              | 6                                                                  |
|                               | 50           | 347234            | 9710                | 95                                      | 11                                                         | 4                                              | 2                                                                  |
|                               | 100          | 600746            | 21750               | 133                                     | 15                                                         | 6                                              | 6                                                                  |
|                               | 200          | 345572            | 15390               | 113                                     | 29                                                         | 14                                             | 14                                                                 |
| <b>Durban 2019</b>            | 20           | 869278            | 5304                | 74                                      | 10                                                         | 7                                              | 5                                                                  |
|                               | 50           | 633810            | 9463                | 50                                      | 7                                                          | 4                                              | 4                                                                  |
|                               | 100          | 619826            | 32631               | 292                                     | 23                                                         | 8                                              | 4                                                                  |
|                               | 200          | 644274            | 48199               | 311                                     | 25                                                         | 15                                             | 10                                                                 |
| <b>Aliwal</b>                 | 20           | 60446             | 6370                | 152                                     | 9                                                          | 8                                              | 8                                                                  |
|                               | 50           | 50792             | 5854                | 187                                     | 13                                                         | 10                                             | 7                                                                  |
|                               | 100          | 31910             | 5225                | 144                                     | 13                                                         | 9                                              | 9                                                                  |
|                               | 200          | 44358             | 8377                | 192                                     | 27                                                         | 15                                             | 14                                                                 |
| <b>Total across all sites</b> | -            | 9 489<br>189      | 346 748             | 1726                                    | 219                                                        | 90                                             | 67                                                                 |
