# Supplementary material for: Metabarcoding of ichthyoplankton communities associated with a highly dynamic shelf region of the southwest Indian Ocean
Source: PubMed Central journal article supplement (PMC10138858; doi:10.1371/journal.pone.0284961), 2023-04-27
Supplement: pone.0284961.s003.pdf [file pone.0284961.s003.pdf]

**S3 Table. Fish species detected by metabarcoding of ichthyoplankton collected over the continental shelf of eastern South Africa, and verification of adult distribution ranges, habitats, and occurrence in different ocean zones.** Barcode records on the BOLD database were used for species identification.

The % similarity to barcode sequences is shown for each species, as well as the accession numbers, geographical origin and number of sequences available on BOLD. The WoRMS, OBIS and GBIF online databases were consulted to confirm the distribution range (Endemic = Endemic to the southwest Indian Ocean; WIO = Western Indian Ocean, including north of the equator; IWP = Indo-West Pacific), habitat and ocean zone frequented by individual species.

| No. | Order            | Family          | Species                                     | % similarity | BIN (BOLD)                 | Records (n), location collected | Known distribution range | Datasets consulted (WoRMS, GBIF, OBIS, etc) | Adult habitats | Ocean zone      | Distribution range |
|-----|------------------|-----------------|---------------------------------------------|--------------|----------------------------|---------------------------------|--------------------------|---------------------------------------------|----------------|-----------------|--------------------|
| 1   | Labriformes      | Labridae        | <i>Anampses caeruleopunctatus</i>           | 100          | BOLD:AAB9969               | (55) South Africa, Indonesia    | WIO, South Africa        | OBIS; GBIF                                  | Benthic-reef   | Neritic_inshore | IWP                |
| 2   | Kurtiformes      | Apogonidae      | <i>Apogon semiornatus</i>                   | 100          | BOLD:AAD2206               | (25) South Africa, Madagascar   | WIO, South Africa        | OBIS; GBIF                                  | Benthic-reef   | Neritic_inshore | IWP                |
| 3   | Scombriformes    | Ariommatidae    | <i>Ariomma indicum (indica)</i>             | 100          | BOLD:ACF5823; BOLD:AAB5941 | (86) South Africa, India        | WIO, South Africa        | OBIS; GBIF                                  | Benthopelagic  | Neritic         | IWP                |
| 4   | Myctophiformes   | Myctophidae     | <i>Bentosema pterotum</i>                   | 99.02        | BOLD:AAM9344               | (25) Indonesia                  | WIO, South Africa        | OBIS; GBIF                                  | Mesopelagic    | Oceanic         | IWP                |
| 5   | Myctophiformes   | Myctophidae     | <i>Bentosema suborbitale</i>                | 100          | BOLD:AAI8542               | (31) Cayman Island              | WIO, South Africa        | OBIS; GBIF                                  | Mesopelagic    | Oceanic         | Circumglobal       |
| 6   | Perciformes      | Caesionidae     | <i>Caesio caeruleaurea</i>                  | 100          | BOLD:ABZ2197               | (87) WIO, Indonesia             | WIO, South Africa        | OBIS; GBIF                                  | Epipelagic     | Neritic_inshore | IWP                |
| 7   | Callionymiformes | Callionymidae   | <i>Callionymus marleyi</i>                  | 99.67        | BOLD:AAW8707               | (7) South Africa                | WIO, South Africa        | OBIS; GBIF                                  | Benthic-soft   | Neritic_inshore | WIO                |
| 8   | Beryciformes     | Berycidae       | <i>Centroberyx spinosus</i>                 | 100          | BOLD:AAF8778               | (10) South Africa               | South Africa             | OBIS; GBIF                                  | Benthopelagic  | Neritic         | Endemic            |
| 9   | Scombriformes    | Centrolophidae  | <i>Centrolophus niger</i>                   | 100          | BOLD:AAC3522               | (11) South Africa               | WIO, South Africa        | OBIS; GBIF                                  | Mesopelagic    | Oceanic         | Circumglobal       |
| 10  | Ovalentaria      | Pomacentridae   | <i>Chromis dasygenys</i>                    | 100          | BOLD:AAJ5401               | (3) South Africa                | WIO, South Africa        | OBIS; GBIF                                  | Benthic-reef   | Neritic_inshore | Endemic            |
| 11  | Ovalentaria      | Pomacentridae   | <i>Chromis opercularis / Chromis weberi</i> | 100          | BOLD:ACF0042               | (13) South Africa, Mozambique   | WIO, South Africa        | OBIS; GBIF                                  | Benthic-reef   | Neritic_inshore | WIO                |
| 12  | Scorpaeniformes  | Platycephalidae | <i>Cociella heemstrai</i>                   | 97.52        | BOLD:AAD7871               | (24) South Africa               | WIO, South Africa        | OBIS; GBIF                                  | Benthic-soft   | Neritic         | WIO                |

|    |                   |                 |                                 |       |                               |                                            |                             |                   |               |                 |                  |
|----|-------------------|-----------------|---------------------------------|-------|-------------------------------|--------------------------------------------|-----------------------------|-------------------|---------------|-----------------|------------------|
| 13 | Scombriformes     | Nomeidae        | <i>Cubiceps whiteleggii</i>     | 99,51 | BOLD:AAB5183                  | (63) South Africa, Australia               | WIO, South Africa           | OBIS; GBIF        | Mesopelagic   | Oceanic         | IWP              |
| 14 | Stomiiformes      | Gonostomatidae  | <i>Cyclothone acclinidens</i>   | 100   | BOLD:AAU0299                  | (29) Atlantic Ocean                        | WIO, South Africa           | OBIS; GBIF        | Mesopelagic   | Oceanic         | Circumglobal     |
| 15 | Stomiiformes      | Gonostomatidae  | <i>Cyclothone microdon</i>      | 100   | BOLD:AAB4944                  | (50) Canada                                | WIO, South Africa           | OBIS; GBIF        | Mesopelagic   | Oceanic         | Circumglobal     |
| 16 | Pleuronectiformes | Cynoglossidae   | <i>Cynoglossus lida</i>         | 100   | BOLD:AAC0744;<br>BOLD:AAB8676 | (49) South Africa                          | WIO, South Africa           | OBIS; GBIF        | Benthic-soft  | Neritic         | IWP              |
| 17 | Carangiformes     | Carangidae      | <i>Decapterus macarellus</i>    | 100   | BOLD:AAC4792                  | (245) South Africa, Indonesia, Philippines | WIO, South Africa           | OBIS; GBIF        | Epipelagic    | Neritic         | Circumglobal     |
| 18 | Carangiformes     | Carangidae      | <i>Decapterus macrosoma</i>     | 100   | BOLD:ADI4344                  | (334) South Africa, Malaysia, Philippines  | WIO, South Africa           | WoRMS; OBIS; GBIF | Epipelagic    | Neritic         | IWP              |
| 19 | Carangiformes     | Carangidae      | <i>Decapterus russelli</i>      | 100   | BOLD:AAB6796                  | (154) South Africa                         | WIO, South Africa           | WoRMS; OBIS; GBIF | Epipelagic    | Neritic         | IWP              |
| 20 | Myctophiformes    | Myctophidae     | <i>Diaphus richardsoni</i>      | 100   | BOLD:AAE0839                  | (31) Australia, Indian Ocean               | WIO, South Africa           | OBIS; GBIF        | Mesopelagic   | Oceanic         | Circumglobal     |
| 21 | Perciformes       | Caesionidae     | <i>Dipterygonotus balteatus</i> | 100   | BOLD:AAD3666                  | (36) South Africa, Indonesia               | WIO, South Africa           | OBIS; GBIF        | Epipelagic    | Neritic         | IWP              |
| 22 | Acanthuriformes   | Emmelichthyidae | <i>Emmelichthys nitidus</i>     | 100   | BOLD:AAE9975;<br>BOLD:AAE9976 | (63) South Africa, Australia               | South Africa, Pacific Ocean | OBIS; GBIF        | Benthopelagic | Neritic         | Circumglobal (S) |
| 23 | Clupeiformes      | Engraulidae     | <i>Encrasicholina punctifer</i> | 100   | BOLD:AAF8837                  | (124) South Africa, China                  | WIO, South Africa           | OBIS; GBIF        | Epipelagic    | Neritic         | IWP              |
| 24 | Clupeiformes      | Engraulidae     | <i>Engraulis capensis</i>       | 100   | BOLD:AAB2317                  | (162) South Africa, China                  | WIO, South Africa           | OBIS; GBIF        | Epipelagic    | Neritic         | WIO              |
| 25 | Clupeiformes      | Clupeidae       | <i>Etrumeus whiteheadi</i>      | 100   | BOLD:AAC3892                  | (21) South Africa                          | WIO, South Africa           | OBIS; GBIF        | Epipelagic    | Neritic         | WIO              |
| 26 | Clupeiformes      | Clupeidae       | <i>Etrumeus wongratanai</i>     | 100   | BOLD:AAC2444                  | (28) South Africa                          | WIO, South Africa           | GBIF              | Epipelagic    | Neritic         | WIO              |
| 27 | Labriformes       | Labridae        | <i>Halichoeres cosmetus</i>     | 100   | BOLD:AAC1194                  | (16) South Africa                          | WIO, South Africa           | OBIS; GBIF        | Benthic-reef  | Neritic_inshore | IWP              |
| 28 | Myctophiformes    | Myctophidae     | <i>Hygophum hygomii</i>         | 100   | BOLD:AAC6495                  | (63) Atlantic Ocean, Indian Ocean          | WIO, South Africa           | OBIS; GBIF        | Mesopelagic   | Oceanic         | Circumglobal     |
| 29 | Myctophiformes    | Myctophidae     | <i>Lampanyctus australis</i>    | 100   | BOLD:AAC0460                  | (49) Atlantic Ocean, Tasman Sea            | WIO, South Africa           | OBIS; GBIF        | Mesopelagic   | Oceanic         | Circumglobal (S) |

|    |                   |                 |                                      |       |                                       |                                    |                   |                         |              |                 |                  |
|----|-------------------|-----------------|--------------------------------------|-------|---------------------------------------|------------------------------------|-------------------|-------------------------|--------------|-----------------|------------------|
| 30 | Myctophiformes    | Myctophidae     | <i>Lampanyctus lepidolychnus</i>     | 99,67 | BOLD:AAB3<br>777                      | (42) South Africa, Canada          | South Africa      | OBIS;<br>GBIF           | Mesopelagic  | Oceanic         | Circumglobal (S) |
| 31 | Myctophiformes    | Myctophidae     | <i>Lobianchia gemellarii</i>         | 99,67 | BOLD:AAC7<br>797                      | (36) Atlantic Ocean, Indian Ocean  | WIO, South Africa | OBIS;<br>GBIF           | Mesopelagic  | Oceanic         | Circumglobal     |
| 32 | Aulopiformes      | Notosudidae     | <i>Luciosudis normani</i>            | 100   | BOLD:AAK6<br>733                      | (6) New Zealand                    | WIO, South Africa | OBIS;<br>GBIF           | Mesopelagic  | Oceanic         | Circumglobal (S) |
| 33 | Stomiiformes      | Sternoptychidae | <i>Maurolicus walvisensis</i>        | 100   | BOLD:AEH5<br>284                      | (40) Atlantic Ocean, Indian Ocean  | South Africa      | OBIS;<br>GBIF           | Mesopelagic  | Oceanic         | WIO              |
| 34 | Perciformes       | Monodactylidae  | <i>Monodactylus argenteus</i>        | 100   | BOLD:<br>AAA9698;<br>BOLD:AAA9<br>699 | (81) South Africa, Madagascar      | WIO, South Africa | OBIS;<br>GBIF           | Epipelagic   | Neritic_inshore | IWP              |
| 35 | Perciformes       | Monodactylidae  | <i>Monodactylus falciformis</i>      | 100   | BOLD:AAE4<br>819                      | (16) South Africa                  | WIO, South Africa | OBIS;<br>GBIF           | Epipelagic   | Neritic_inshore | IWP              |
| 36 | Myctophiformes    | Myctophidae     | <i>Myctophum selenops</i>            | 99,51 | BOLD:AAU3<br>494                      | (27) Indian Ocean                  | WIO, South Africa | OBIS;<br>GBIF           | Mesopelagic  | Oceanic         | Circumglobal     |
| 37 | Scombriformes     | Gempylidae      | <i>Nealotus tripes</i>               | 96,33 | BOLD:AAC6<br>290                      | (40) Canada                        | WIO, South Africa | OBIS;<br>GBIF           | Mesopelagic  | Oceanic         | Circumglobal     |
| 38 | Myctophiformes    | Myctophidae     | <i>Notolychnus valdiviae</i>         | 100   | BOLD:AAF26<br>98                      | (40) Atlantic Ocean, Pacific Ocean | WIO, South Africa | OBIS;<br>GBIF           | Mesopelagic  | Oceanic         | Circumglobal     |
| 39 | Anguilliformes    | Ophichthidae    | <i>Ophisurus serpens</i>             | 99,51 | BOLD:AAE1<br>881;<br>BOLD:ADO0<br>383 | (27) South Africa, Indonesia       | WIO, South Africa | OBIS;<br>GBIF           | Benthic-soft | Neritic         | IWP              |
| 40 | Blenniiformes     | Blenniidae      | <i>Parablennius pilicornis</i>       | 100   | BOLD:AAF78<br>33                      | (16) South Africa                  | South Africa      | OBIS;<br>GBIF           | Benthic-reef | Neritic_inshore | WIO              |
| 41 | Labriformes       | Labridae        | <i>Paracheilinus mccoskeri</i>       | 100   | BOLD:AAE2<br>895                      | (12) Sri Lanka                     | WIO               | OBIS                    | Benthic-reef | Neritic_inshore | IWP              |
| 42 | Trachiniformes    | Pinguipedidae   | <i>Parapercis somaliensis</i>        | 98,99 | BOLD:AAI57<br>93                      | (1) South Africa                   | WIO               | OBIS;<br>GBIF           | Benthic-soft | Neritic         | WIO              |
| 43 | Perciformes       | Mullidae        | <i>Parupeneus fraserorum</i>         | 99,51 | BOLD:AAF87<br>76                      | (31) South Africa                  | WIO, South Africa | OBIS;<br>GBIF           | Benthic-soft | Neritic         | Endemic          |
| 44 | Perciformes       | Haemulidae      | <i>Plectorhinchus flavomaculatus</i> | 100   | BOLD:AAC4<br>020                      | (27) South Africa, Madagascar      | WIO, South Africa | WoRMS;<br>OBIS;<br>GBIF | Benthic-reef | Neritic_inshore | IWP              |
| 45 | Perciformes       | Haemulidae      | <i>Pomadasys olivaceus</i>           | 100   | BOLD:AAD1<br>379                      | (42) South Africa                  | WIO, South Africa | OBIS;<br>GBIF           | Benthic-soft | Neritic_inshore | WIO              |
| 46 | Perciformes       | Haemulidae      | <i>Pomadasys striatus</i>            | 100   | BOLD:AAD1<br>385                      | (19) South Africa                  | WIO, South Africa | OBIS;<br>GBIF           | Benthic-reef | Neritic_inshore | Endemic          |
| 47 | Mugiliformes      | Mugilidae       | <i>Pseudomyxus capensis</i>          | 100   | BOLD:AAC5<br>938                      | (21) South Africa                  | South Africa      | OBIS;<br>GBIF           | Benthic-soft | Neritic_inshore | Endemic          |
| 48 | Pleuronectiformes | Paralichthyidae | <i>Pseudorhombus elevatus</i>        | 100   | BOLD:AAB6<br>447;<br>BOLD:AAB6<br>448 | (36) South Africa                  | WIO, South Africa | OBIS;<br>GBIF           | Benthic-soft | Neritic         | IWP              |

|    |                  |                 |                                       |       |                                                                                                      |                                               |                      |                         |              |                 |                     |
|----|------------------|-----------------|---------------------------------------|-------|------------------------------------------------------------------------------------------------------|-----------------------------------------------|----------------------|-------------------------|--------------|-----------------|---------------------|
| 49 | Kurtiformes      | Apogonidae      | <i>Rhabdamia gracilis</i>             | 100   | BOLD:AAC9<br>583                                                                                     | (33) China                                    | WIO, South<br>Africa | OBIS;<br>GBIF           | Benthic-reef | Neritic_inshore | IWP                 |
| 50 | Clupeiformes     | Clupeidae       | <i>Sardinella gibbosa</i>             | 100   | BOLD:AAB7<br>263;<br>BOLD:AAB7<br>262                                                                | (201) Israel,<br>Thailand,<br>Mozambique      | WIO, South<br>Africa | WORMS;<br>OBIS;<br>GBIF | Epipelagic   | Neritic         | IWP                 |
| 51 | Clupeiformes     | Clupeidae       | <i>Sardinops sagax</i>                | 99,67 | BOLD:AAB6<br>180                                                                                     | (141) South<br>Africa,<br>Australia           | WIO, South<br>Africa | WoRMS;<br>OBIS;<br>GBIF | Epipelagic   | Neritic         | Circumglobal        |
| 52 | Aulopiformes     | Synodontidae    | <i>Saurida cf<br/>undosquamis</i>     | 100   | BOLD:AAB1<br>853;<br>BOLD:ACG7<br>154;<br>BOLD:AAD1<br>070;<br>BOLD:AAB1<br>852;<br>BOLD:AAB1<br>856 | (170) South<br>Africa,<br>Australia,<br>India | WIO, South<br>Africa | OBIS;<br>GBIF           | Benthic-soft | Neritic         | WIO                 |
| 53 | Blenniiformes    | Blenniidae      | <i>Scartella<br/>emarginata</i>       | 100   | BOLD:AAE4<br>361                                                                                     | (9) South<br>Africa                           | WIO, South<br>Africa | OBIS;<br>GBIF           | Benthic-reef | Neritic_inshore | IWP                 |
| 54 | Scombriformes    | Scombridae      | <i>Scomber japonicus</i>              | 100   | BOLD:AAA5<br>957                                                                                     | (227) South<br>Africa, Turkey                 | WIO, South<br>Africa | OBIS;<br>GBIF           | Epipelagic   | Neritic         | IWP                 |
| 55 | Myctophiformes   | Myctophidae     | <i>Scopelopsis<br/>multipunctatus</i> | 100   | BOLD:AAD1<br>092                                                                                     | (26) South<br>Africa                          | WIO, South<br>Africa | OBIS;<br>GBIF           | Mesopelagic  | Oceanic         | Circumglobal<br>(S) |
| 56 | Aulopiformes     | Notosudidae     | <i>Scopelosaurus<br/>hamiltoni</i>    | 100   | BOLD:AAI07<br>83;<br>BOLD:AAI07<br>84                                                                | (6) Australia                                 | South Africa         | OBIS;<br>GBIF           | Mesopelagic  | Oceanic         | Circumglobal<br>(S) |
| 57 | Perciformes      | Serranidae      | <i>Serranus cabrilla</i>              | 100   | BOLD:AAD1<br>027                                                                                     | (128) Turkey                                  | WIO, South<br>Africa | OBIS;<br>GBIF           | Benthic-reef | Neritic         | Endemic             |
| 58 | Spariformes      | Sillaginidae    | <i>Sillago sihama</i>                 | 100   | BOLD:AAA7<br>603                                                                                     | (5) South<br>Africa                           | WIO                  | GBIF                    | Benthic-soft | Neritic_inshore | IWP                 |
| 59 | Scorpaeniformes  | Platycephalidae | <i>Sorsogona<br/>portuguesa</i>       | 100   | BOLD:AAF87<br>84                                                                                     | (21) South<br>Africa                          | WIO, South<br>Africa | OBIS;<br>GBIF           | Benthic-soft | Neritic         | Endemic             |
| 60 | Istiophoriformes | Sphyraenidae    | <i>Sphyraena<br/>chrysotaenia</i>     | 100   | BOLD:AAD0<br>400                                                                                     | (61) South<br>Africa,<br>Mozambique           | WIO, South<br>Africa | OBIS;<br>GBIF           | Epipelagic   | Neritic         | IWP                 |
| 61 | Spariformes      | Sparidae        | <i>Spicara australis</i>              | 100   | BOLD:AAO4<br>385                                                                                     | (4) South<br>Africa                           | WIO, South<br>Africa | OBIS;<br>GBIF           | Mesopelagic  | Oceanic         | Endemic             |
| 62 | Spariformes      | Sparidae        | <i>SpondylIOSoma<br/>emarginatum</i>  | 100   | BOLD:ABZ61<br>75                                                                                     | (13) South<br>Africa                          | WIO, South<br>Africa | OBIS;<br>GBIF           | Benthic-reef | Neritic_inshore | Endemic             |
| 63 | Labriformes      | Labridae        | <i>Stethojulis<br/>albovittata</i>    | 100   | BOLD:AAD4<br>824                                                                                     | (31)<br>Mozambique,<br>Reunion                | WIO, South<br>Africa | OBIS;<br>GBIF           | Benthic-reef | Neritic_inshore | WIO                 |
| 64 | Stomiiformes     | Stomiidae       | <i>Stomias boa</i>                    | 99,67 | BOLD:AAB1<br>180                                                                                     | (86) South<br>Africa,<br>Canada               | South Africa         | OBIS;<br>GBIF           | Mesopelagic  | Oceanic         | Circumglobal        |

|           |                 |            |                                                                   |     |                  |                                |                      |               |              |         |         |
|-----------|-----------------|------------|-------------------------------------------------------------------|-----|------------------|--------------------------------|----------------------|---------------|--------------|---------|---------|
| <b>65</b> | Carangiformes   | Carangidae | <i>Trachurus delagoa</i>                                          | 100 | BOLD:AAA8<br>614 | (55) South<br>Africa           | WIO, South<br>Africa | OBIS;<br>GBIF | Epipelagic   | Neritic | Endemic |
| <b>66</b> | Acanthuriformes | Sciaenidae | <i>Umbrina robinsoni</i><br><i>/Umbrina</i><br><i>canariensis</i> | 100 | BOLD:AAE0<br>529 | (12) South<br>Africa           | South Africa         | OBIS;<br>GBIF | Benthic-reef | Neritic | WIO     |
| <b>67</b> | Perciformes     | Mullidae   | <i>Upeneus guttatus</i>                                           | 100 | BOLD:AAB9<br>327 | (113)<br>Indonesia,<br>Vietnam | WIO, South<br>Africa | OBIS;<br>GBIF | Benthic-soft | Neritic | IWP     |
