# Supplementary material for: Metabarcoding of ichthyoplankton communities associated with a highly dynamic shelf region of the southwest Indian Ocean
Source: PubMed Central journal article supplement (PMC10138858; doi:10.1371/journal.pone.0284961), 2023-04-27
Supplement: pone.0284961.s004.pdf [file pone.0284961.s004.pdf]

**S4 Table. Summary statistics of the various environmental variables associated with each plankton sample.** SD = standard deviation. \* = days. The average  $\pm$  standard deviation latitude of samples was  $-29.6329 \pm 0.6902^\circ$ , with the southern- and northern-most samples extending from  $-30.2886^\circ$  to  $-27.9202^\circ$ , respectively. Longitude averaged  $31.3772 \pm 0.5568^\circ$  and ranged by  $1.8^\circ$ . The average isobath sampled was  $87.5 \pm 66.8$  m. Average distance to coast and distance to shelf edge of samples was  $10.2 \pm 12.0$  km and  $7.3 \pm 10.1$  km, respectively. The average date of sampling was in the austral spring of 2018, and samples were collected within a range of 369 days.

| <b>Statistic</b> | <b>Latitude (°)</b> | <b>Longitude (°)</b> | <b>Isobath (m)</b> | <b>Dist_coast (km)</b> | <b>Dist_shelf (km)</b> | <b>Date</b> |
|------------------|---------------------|----------------------|--------------------|------------------------|------------------------|-------------|
| Average          | -29.6329            | 31.3772              | 87.5               | 10.2                   | 7.3                    | 2018/11/23  |
| SD               | 0.6902              | 0.5568               | 66.8               | 12.0                   | 10.1                   | 132*        |
| Min              | -30.2886            | 30.8033              | 20.0               | 1.1                    | 0.0                    | 2018/08/02  |
| Max              | -27.9202            | 32.6132              | 200.0              | 42.7                   | 39.5                   | 2019/08/06  |
